# Supplementary material for: A new photochromic-ligand-based luminescent coordination polymer as a MnO4− sensor with extremely high sensitivity and excellent selectivity
Source: Royal Society of Chemistry journal article supplement (doi:10.1039/d1tc05406f), 2021-12-24
Supplement: d1tc05406f1.pdf [file d1tc05406f1.pdf]

## Supporting Information

### **New photochromic-ligand-based luminescent coordination polymer as MnO<sub>4</sub><sup>-</sup> sensor with extremely high sensitivity and excellent selectivity**

Zhuo Lin,<sup>a</sup> Wenjing Li,<sup>a</sup> Quan Chen,<sup>a</sup> Ling Chen,<sup>a</sup> Chi Zhang\*,<sup>a,b</sup> Jinfang Zhang\*,<sup>a</sup>

<sup>a</sup> International Joint Research Center for Photoresponsive Molecules and Materials, School of Chemical and Material Engineering, Jiangnan University, Wuxi 214122, P. R. China; <sup>b</sup> School of Chemical Science and Engineering, Tongji University, Shanghai 200092, P. R. China

#### **Table of contents**

- 1. Scheme S1** Synthetic route of ligand **L**.
- 2. Scheme S2** Photocyclization and dehydrogenation process of **L**.
- 3. Fig. S1** The particle size distributions for **1** and **1'** in H<sub>2</sub>O suspension.
- 4. Fig. S2** (a) HRMS spectrum of **L** in dichloromethane solution (10<sup>-6</sup>M) before 365nm UV irradiation and O<sub>2</sub>, (b) HRMS spectrum of **L** in dichloromethane solution (10<sup>-6</sup>M) after 365nm UV irradiation O<sub>2</sub>.
- 5. Fig. S3** The asymmetric unit of **1**.
- 6. Fig. S4** The simulated and experimental PXRD of **1** and **1'**.
- 7. Fig. S5** The TGA of **1**.
- 8. Fig. S6** Time-dependent PL spectra of H<sub>2</sub>O suspension of crystal **1** (0.02 mg/ml) irradiated by 365nm UV light (λ<sub>ex</sub> = 396 nm).
- 9. Fig. S7** Time-dependent UV-Vis spectra suspension of crystal **1** in water (0.005mg/ml) irradiated by 365nm UV light.
- 10. Fig. S8** Reusability of **1** (a) and **1'** (b) for sensing MnO<sub>4</sub><sup>-</sup> in H<sub>2</sub>O.
- 11. Fig. S9** PXRD patterns of **1** (a) and **1'** (b) after four cycles detecting MnO<sub>4</sub><sup>-</sup>

compared with original patterns.

- 12. Fig. S10** pH effect on the emission intensity of **1'** and **1'+MnO<sub>4</sub><sup>-</sup>** from pH 2-14.
- 13. Fig. S11** FT-IR spectra of **1** and **1'** and after soaking in MnO<sub>4</sub><sup>-</sup> for 12 hours.
- 14. Fig. S12** The emission lifetimes of **1** dispersed in H<sub>2</sub>O before (a) and after detecting CrO<sub>4</sub><sup>2-</sup> (b), Cr<sub>2</sub>O<sub>7</sub><sup>2-</sup> (c), and MnO<sub>4</sub><sup>-</sup> (d).
- 15. Fig. S13** The emission lifetimes of **1'** dispersed in H<sub>2</sub>O before (a) and after detecting MnO<sub>4</sub><sup>-</sup> (b).
- 16. Fig. S14** Crystal structure of **L**.
- 17. Table S1** Crystallographic data and structure refinement for **L** and **1**.

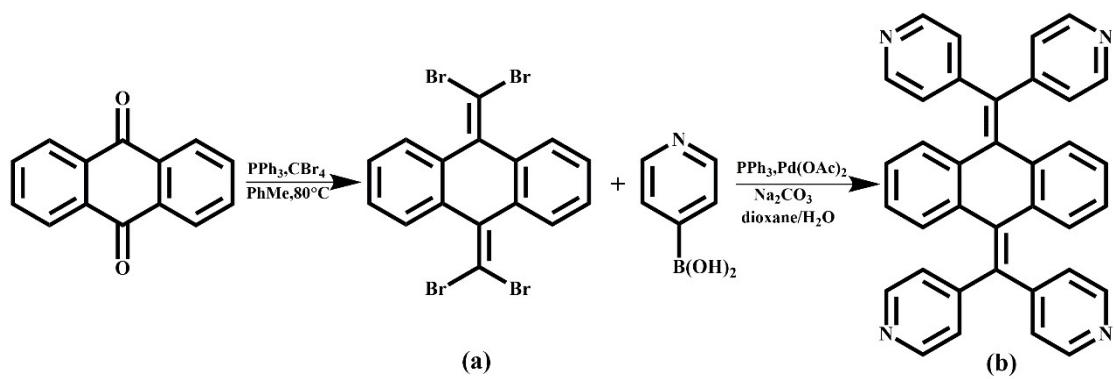

Scheme S1 Synthetic route of ligand L.

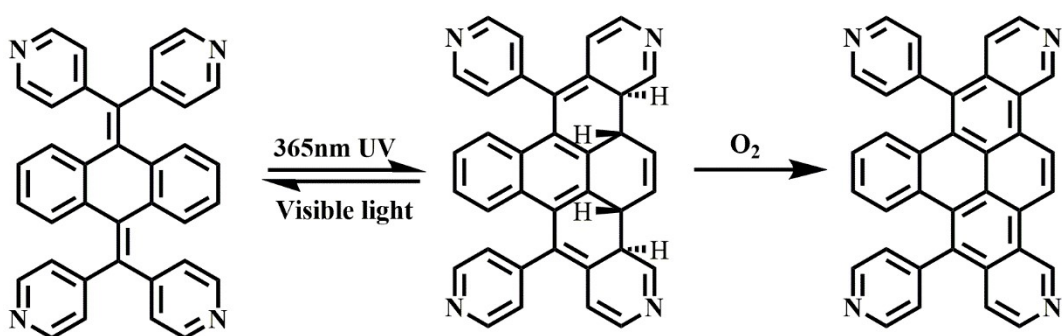

Scheme S2 Photocyclization and dehydrogenation process of L.

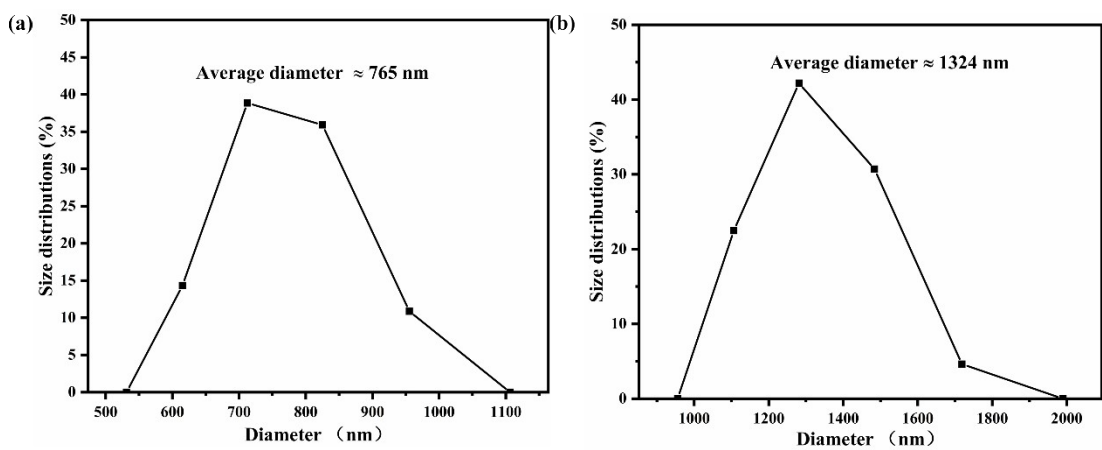

Fig. S1 The particle size distributions for 1 and 1' in H<sub>2</sub>O suspension.

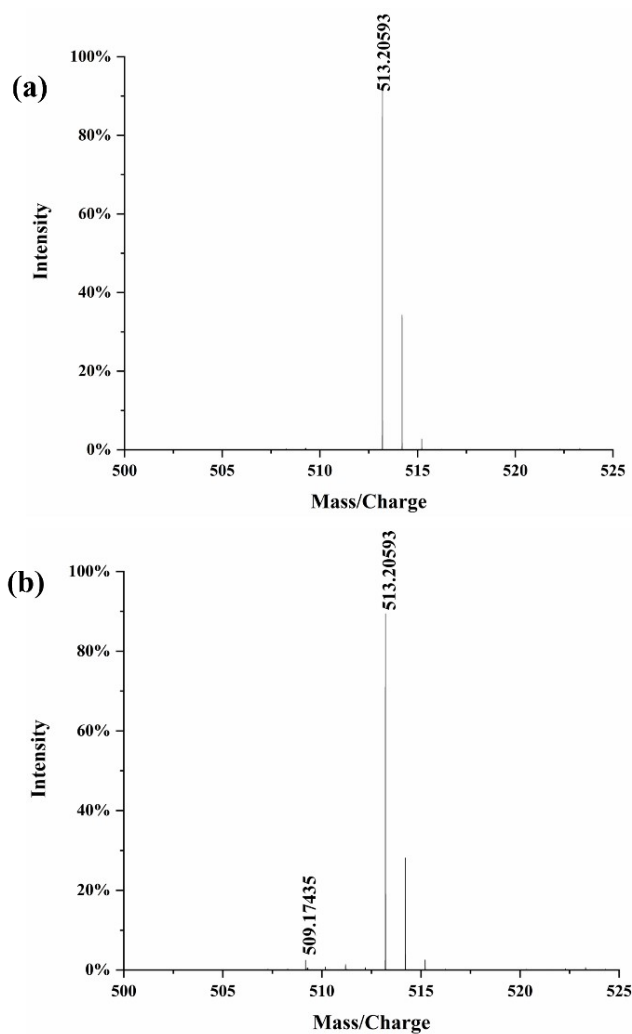

**Fig. S2** (a) HRMS spectrum of **L** in  $\text{CH}_2\text{Cl}_2$  solution ( $10^{-6}\text{M}$ ) before 365nm UV irradiation and  $\text{O}_2$ , (b) HRMS spectrum of **L** in  $\text{CH}_2\text{Cl}_2$  solution ( $10^{-6}\text{M}$ ) after 365nm UV irradiation and  $\text{O}_2$ .

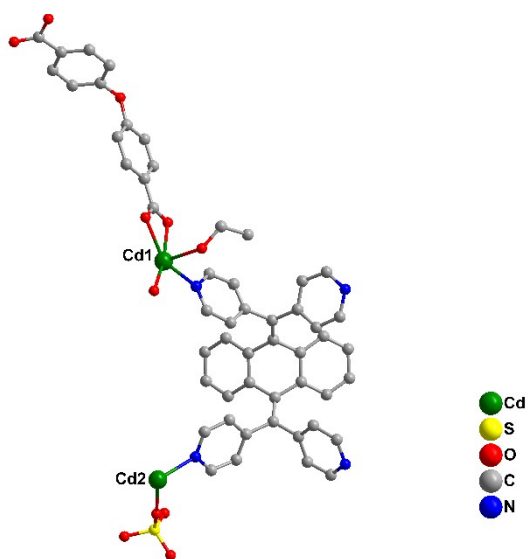

**Fig. S3** The asymmetric unit of **1**.

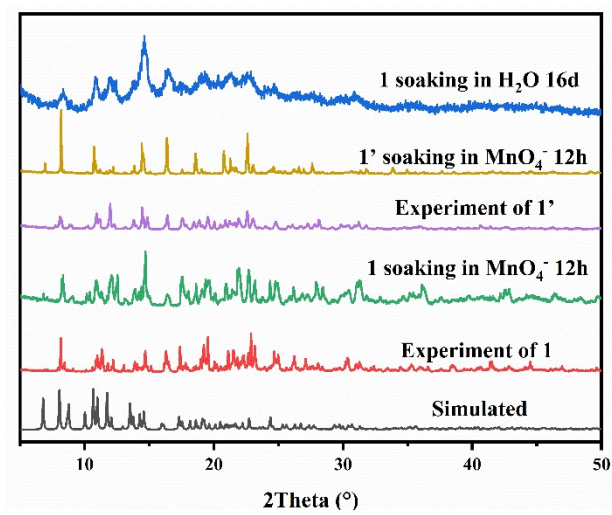

**Fig. S4** The simulated and experimental PXRD of **1** and **1'**.

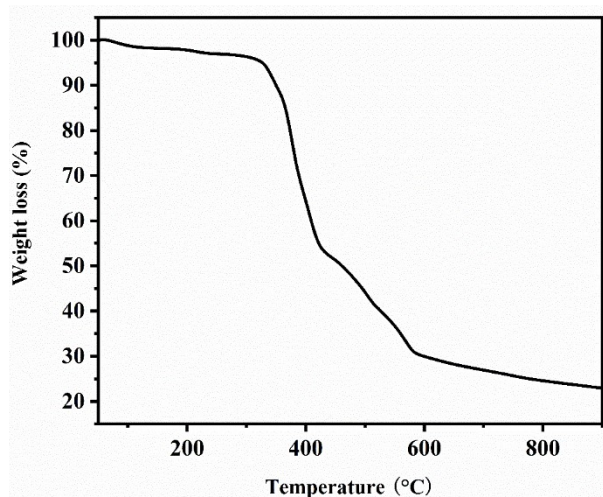

**Fig. S5** The TGA of **1**.

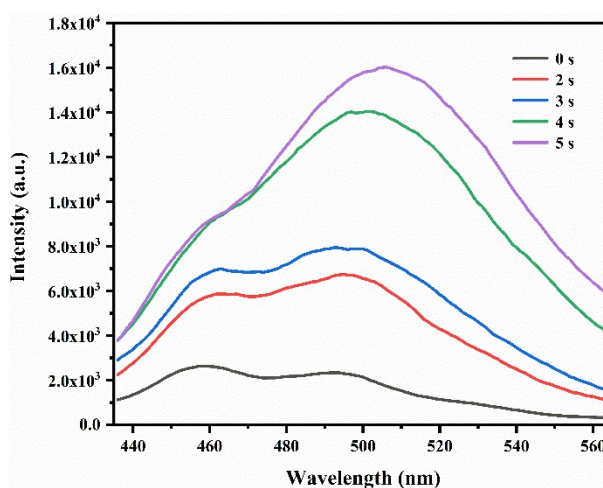

**Fig. S6** Time-dependent PL spectra of H<sub>2</sub>O suspension of crystal **1** (0.02 mg/ml) irradiated by 365nm UV light ( $\lambda_{\text{ex}} = 396$  nm).

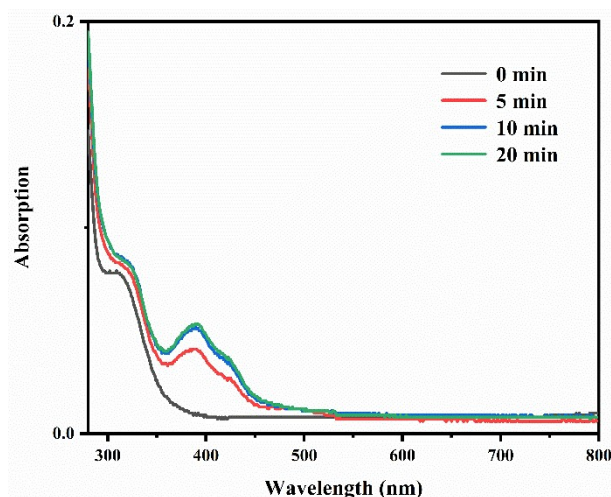

**Fig. S7** Time-dependent UV-Vis spectra suspension of crystal **1** in water (0.005mg/ml) irradiated by 365nm UV light.

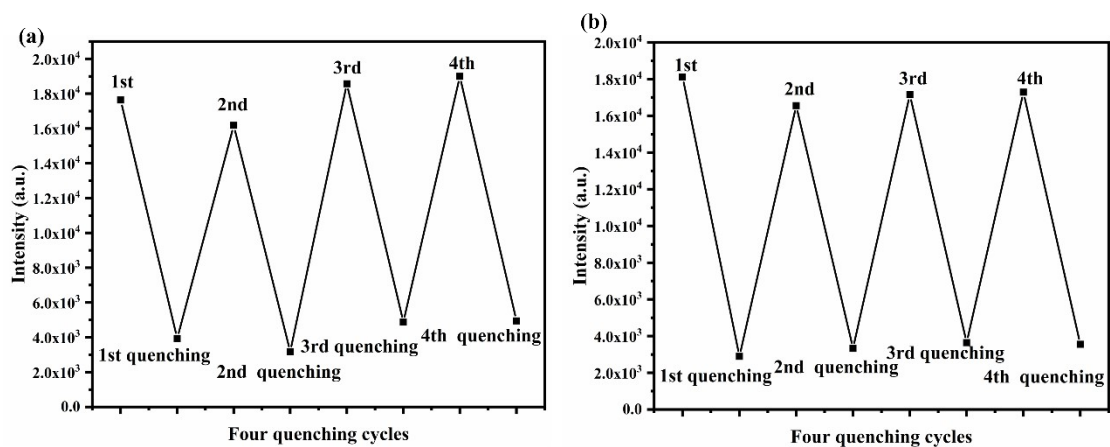

**Fig. S8** Reusability of **1** (a) and **1'** (b) for sensing  $\text{MnO}_4^-$  in  $\text{H}_2\text{O}$ .

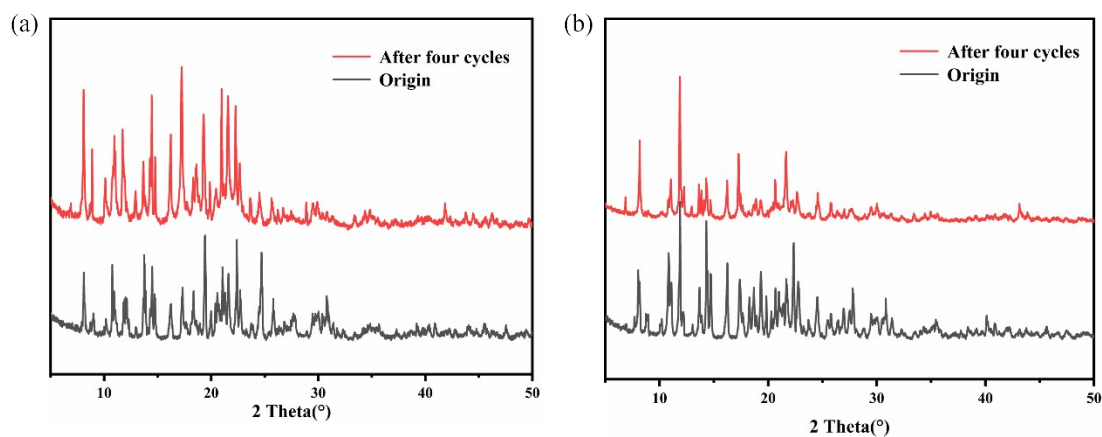

**Fig. S9** PXRD patterns of **1** (a) and **1'** (b) after four cycles detecting  $\text{MnO}_4^-$  compared with original patterns.

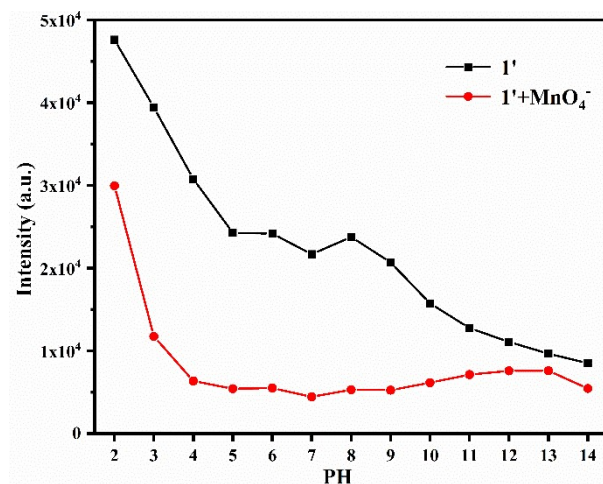

**Fig. S10** pH effect on the emission intensity of  $1'$  and  $1'+\text{MnO}_4^-$  from pH 2-14.

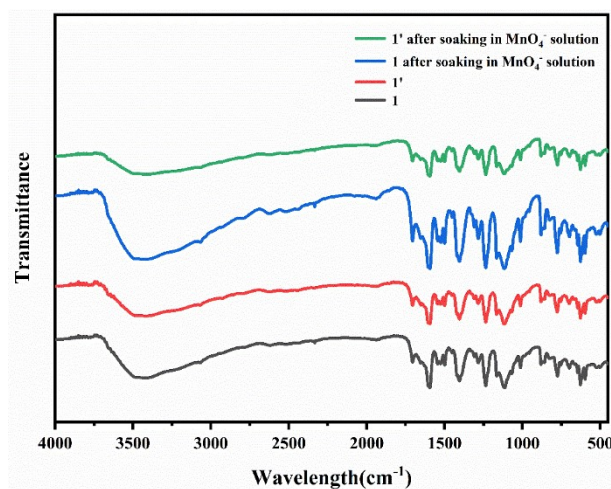

**Fig. S11** FT-IR spectra of  $1$  and  $1'$  before and after soaking in  $\text{MnO}_4^-$  for 12 hours.



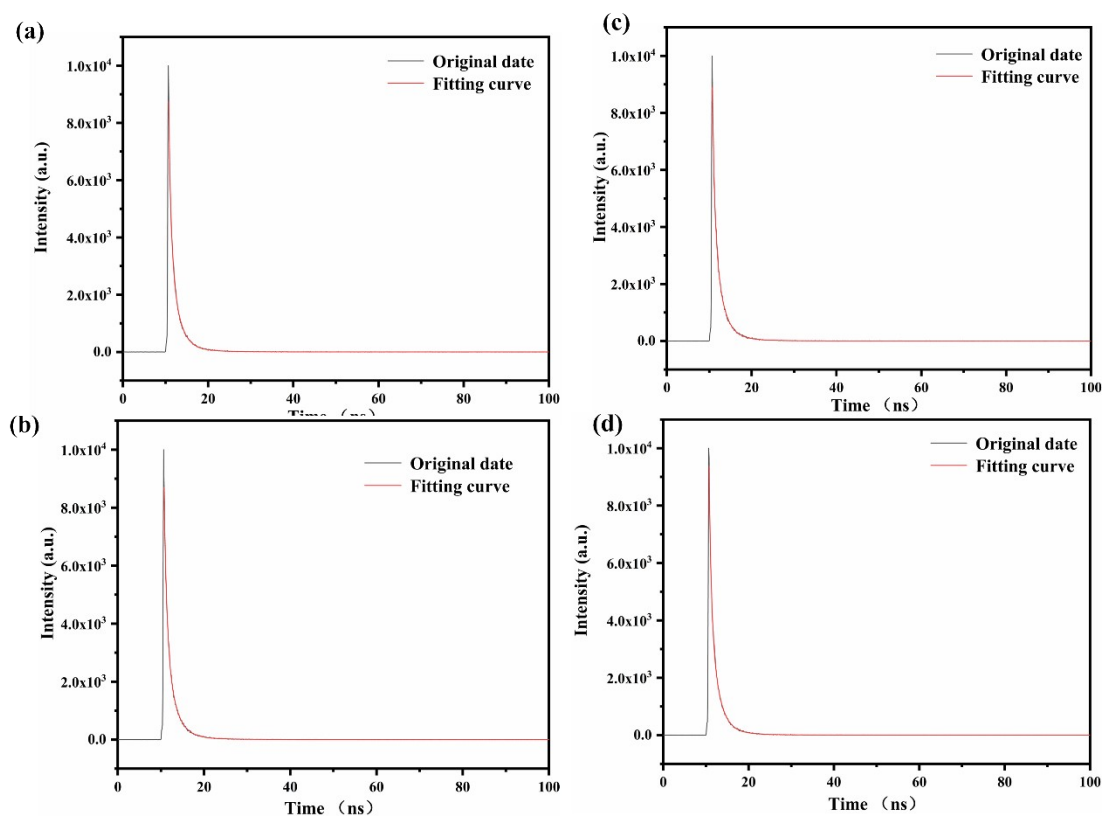

**Fig. S12** The emission lifetimes of **1** dispersed in  $\text{H}_2\text{O}$  before (a) and after detecting  $\text{CrO}_4^{2-}$  (b),  $\text{Cr}_2\text{O}_7^{2-}$  (c), and  $\text{MnO}_4^-$  (d).

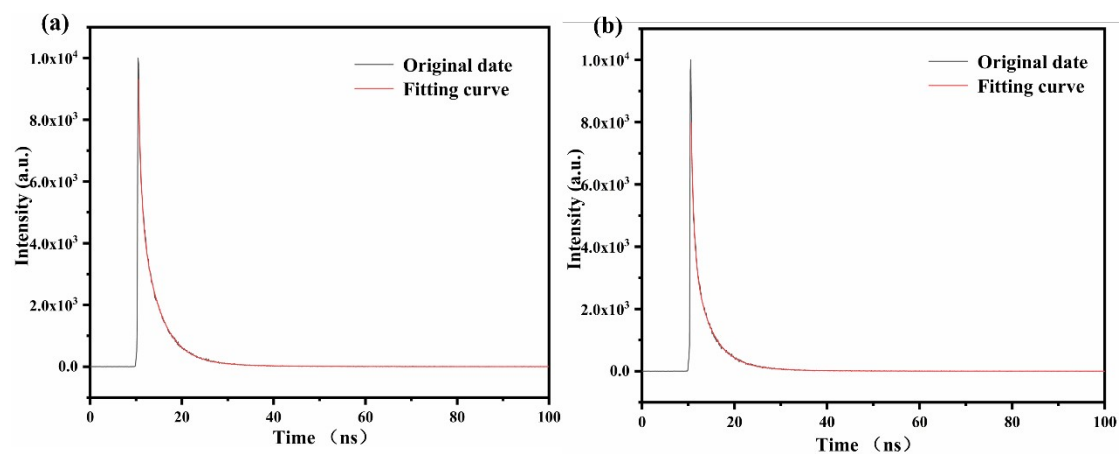

**Fig. S13** The emission lifetimes of **1'** dispersed in  $\text{H}_2\text{O}$  before (a) and after detecting  $\text{MnO}_4^-$  (b).

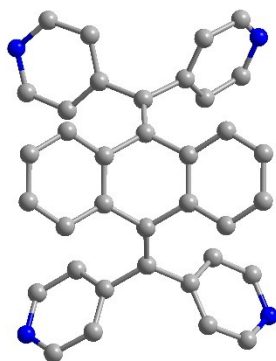

**Fig. S14** Crystal structure of **L**.

**Table S1** Crystallographic data and structure refinement for **L** and **1**.

| Compound                                             | <b>L</b>                                       | <b>1</b>                                                                           |
|------------------------------------------------------|------------------------------------------------|------------------------------------------------------------------------------------|
| Molecular formula                                    | C <sub>36</sub> H <sub>24</sub> N <sub>4</sub> | C <sub>52</sub> H <sub>39</sub> Cd <sub>1.5</sub> N <sub>4</sub> O <sub>11</sub> S |
| formula weight                                       | 512.59                                         | 1096.53                                                                            |
| Temperature (K)                                      | 293(2)                                         | 293(2)                                                                             |
| Wavelength (Å)                                       | 1.54178 Å                                      | 1.54178 Å                                                                          |
| Crystal system                                       | Monoclinic                                     | Triclinic                                                                          |
| Space group                                          | P2(1)/c                                        | P-1                                                                                |
| <i>a</i> (Å)                                         | 10.3749(2)                                     | 10.6151(3)                                                                         |
| <i>b</i> (Å)                                         | 16.3863(3)                                     | 13.2680(5)                                                                         |
| <i>c</i> (Å)                                         | 16.0337(3)                                     | 21.1599(8)                                                                         |
| $\alpha$ (°)                                         | 90°                                            | 87.133(2)                                                                          |
| $\beta$ (°)                                          | 97.9910(10)°                                   | 75.585(2)                                                                          |
| $\gamma$ (°)                                         | 90°                                            | 78.772(2)                                                                          |
| <i>V</i> (Å <sup>3</sup> )                           | 2699.36(9) Å <sup>3</sup>                      | 2831.11(17)                                                                        |
| <i>Z</i>                                             | 4                                              | 2                                                                                  |
| $\rho_{\text{calc}} / \text{Mg} \cdot \text{m}^{-3}$ | 1.261                                          | 1.286                                                                              |
| $\mu / \text{mm}^{-1}$                               | 0.584                                          | 5.366                                                                              |
| <i>F</i> (000)                                       | 1072                                           | 1110                                                                               |

---

|                                                                                 |               |              |
|---------------------------------------------------------------------------------|---------------|--------------|
| Reflections collected                                                           | 35524         | 34443        |
| Unique reflections                                                              | 5506          | 11415        |
| $R_{\text{int}}$                                                                | 0.0549        | 0.0732       |
| No. parameters                                                                  | 361           | 643          |
| $GOF$                                                                           | 1.037         | 1.079        |
| $R_1 [I > 2\sigma(I)]$                                                          | 0.0489        | 0.0488       |
| $wR_2 [I > 2\sigma(I)]$                                                         | 0.1203        | 0.1277       |
| $\Delta\rho_{\text{max}} / \Delta\rho_{\text{min}} (\text{e } \text{\AA}^{-3})$ | 0.294 /-0.259 | 0.723/-1.241 |

---
